# Supplementary material for: Improving Editing Efficiency for the Sequences with NGH PAM Using xCas9-Derived Base Editors
Source: PubMed Central journal article supplement — Mol Ther Nucleic Acids. 2019 Jul 12;17:626–35. doi: 10.1016/j.omtn.2019.06.024 (PMC6699141; doi:10.1016/j.omtn.2019.06.024), 2019-07-12
Supplement: mmc1.pdf [file mmc1.pdf]

OMTN, Volume 17

## **Supplemental Information**

### **Improving Editing Efficiency for the Sequences with NGH PAM Using xCas9-Derived Base Editors**

**Xinyi Liu, Guanglei Li, Xueliang Zhou, Yunbo Qiao, Ruixuan Wang, Shaohui Tang, Jianqiao Liu, Lisheng Wang, and Xingxu Huang**

## Supplemental Information

### Supplementary figure 1

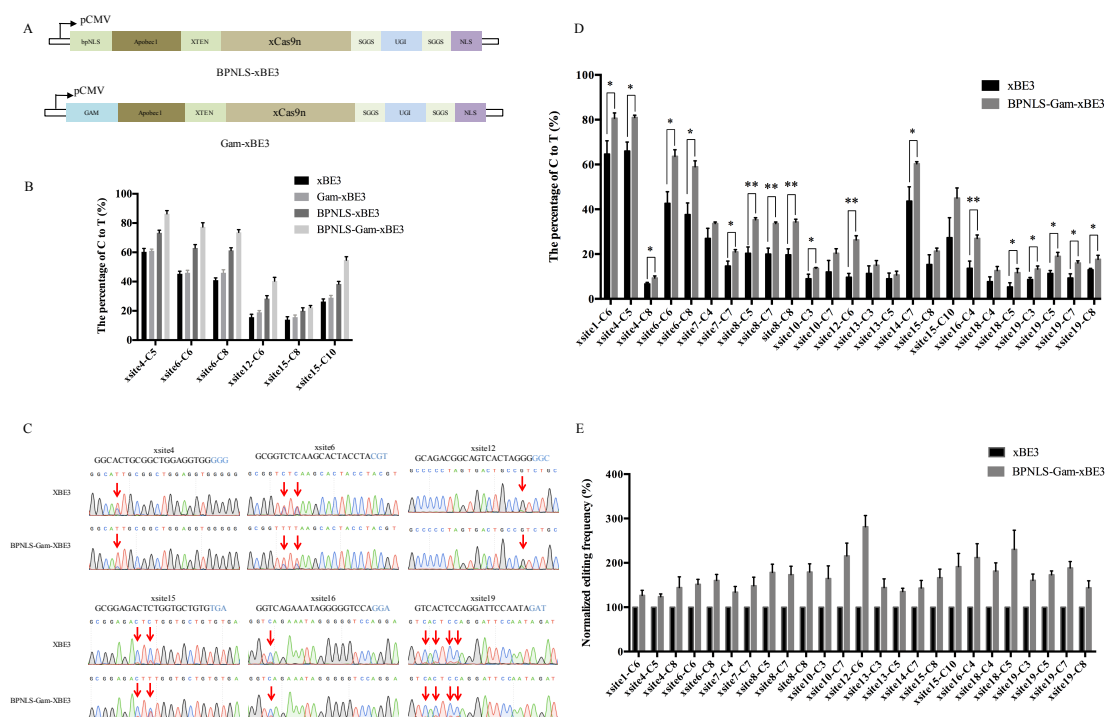

### Supplementary figure 1. Editing frequency of xBE3 and BP-NLS-Gam-xBE3 on xSites in human cells.

- Schematic diagram illustrating the design of expression vectors of BP-NLS-xBE3 and Gam-xBE3.
- Histogram of editing efficiency between xBE3, BP-NLS-xBE3, Gam-xBE3, and BP-NLS-Gam-xBE3. The editing efficiency was indicated as the percentage of targeted C-to-T base substitution at indicated sites. Data from three independent experiments are shown as means  $\pm$  s.e.m.
- Sequence chromatogram of representative sites with different PAM (NGG, NGT, NGC, NGA and GAT) were presented, the PAM sequences are highlighted in blue. Red arrows indicate the edited bases.
- The editing frequencies of indicated loci edited by xBE3 or BP-NLS-Gam-

xBE3 were presented. PCR products were subjected for Sanger sequencing and the results were quantified by online software EditR. Data from three independent experiments are shown as means  $\pm$  s.e.m, the asterisks denote statistical significance, “\*”, P<0.05, “\*\*”, P<0.01.

E. Normalized editing frequency of xBE3 and BPNLS-Gam-xBE3. Set the editing frequency of xBE3 as 100 percent.

## Supplementary figure 2

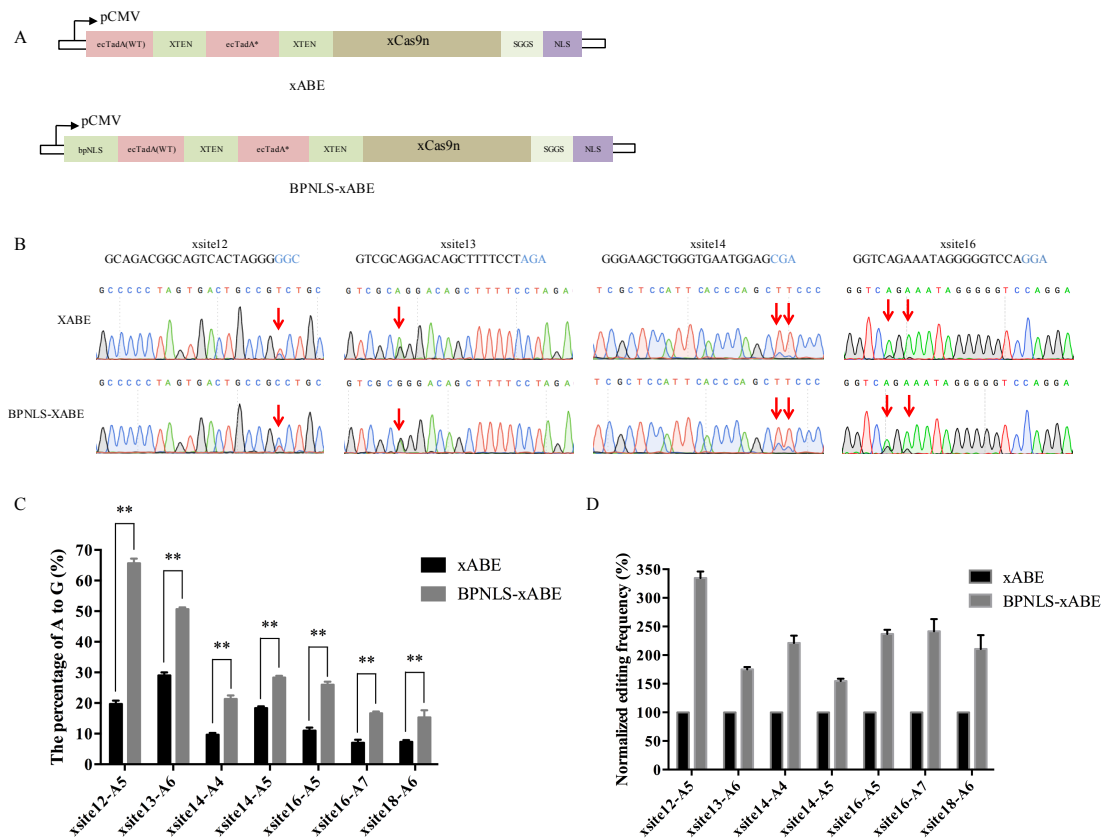

### Supplementary figure 2. Comparison of editing efficiency of xABE and BP-NLS-xABE in human cells.

- Schematic diagram illustrating the design of expression vectors of xABE and BP-NLS-xABE.
- Sequence chromatogram of representative sites edited by xABE and BP-NLS-xABE. Red arrows indicate bases edited by xABE or BP-NLS-xABE, the PAM sequences are highlighted in blue.
- The editing frequencies of xABE and BP-NLS-xABE. The editing efficiency was indicated as the percentage of A-to-G conversion at indicated loci. Data from three independent experiments are shown as means  $\pm$  s.e.m., the asterisks denote statistical significance, “\*”,  $P < 0.05$ , “\*\*”,  $P < 0.01$ .

D. Normalized editing frequency of BPNLS-xABE to xABE, set the editing frequency of xABE as 100 percent.

### Supplementary figure 3

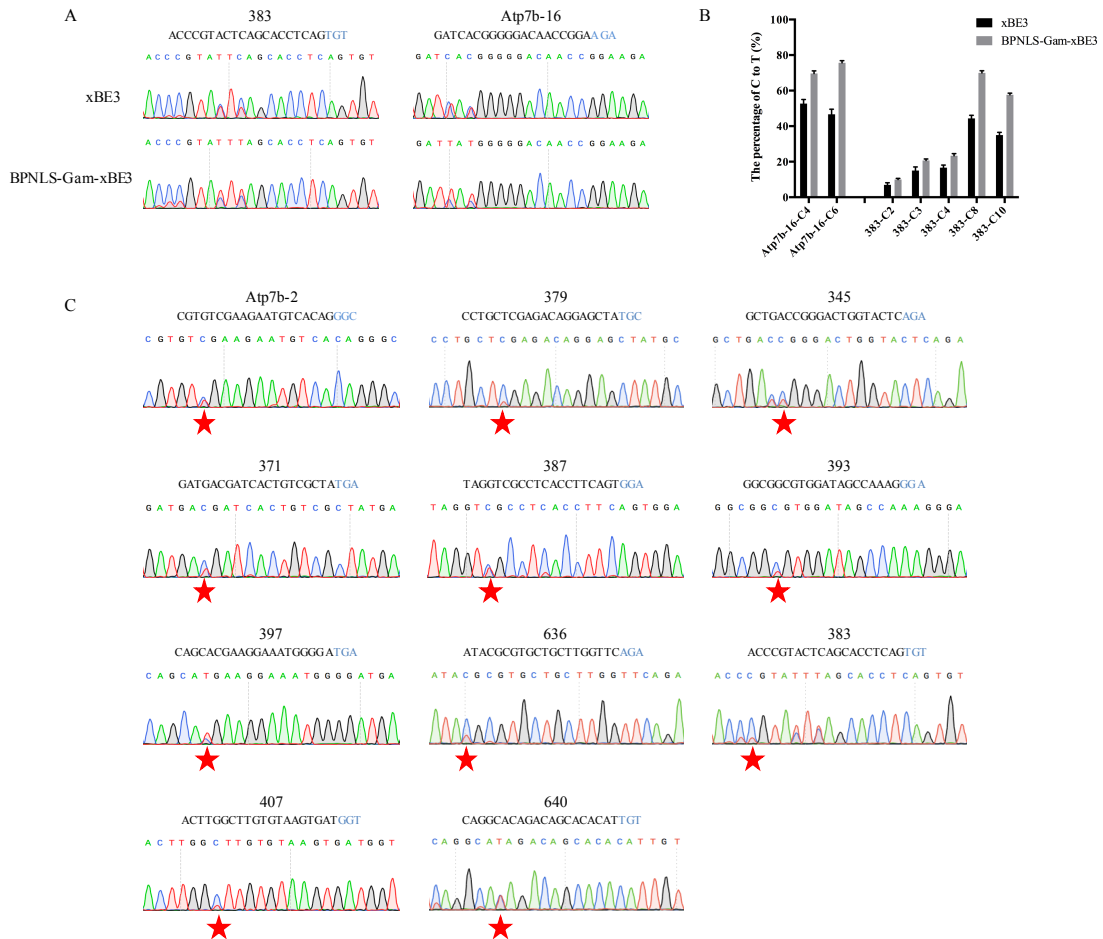

### Supplementary figure 3. Pathogenic mutations created by xBE3 and BPNLS-Gam-xBE3 in human cells.

- Sequence chromatogram of editing pattern of xBE3 and BPNLS-Gam-xBE3 at pathogenic sites 383 and Atp7b-16.
- Histogram of editing frequency of xBE3 and BPNLS-Gam-xBE3 at each edited position.
- Chromatogram of representative pathogenic sites with different PAM edited by BPNLS-Gam-xBE3. The PAM sequences are highlighted in blue. Red

stars indicate the desired pathogenic mutations introduced by BPNLS-Gam-xBE3.

#### Supplementary figure 4

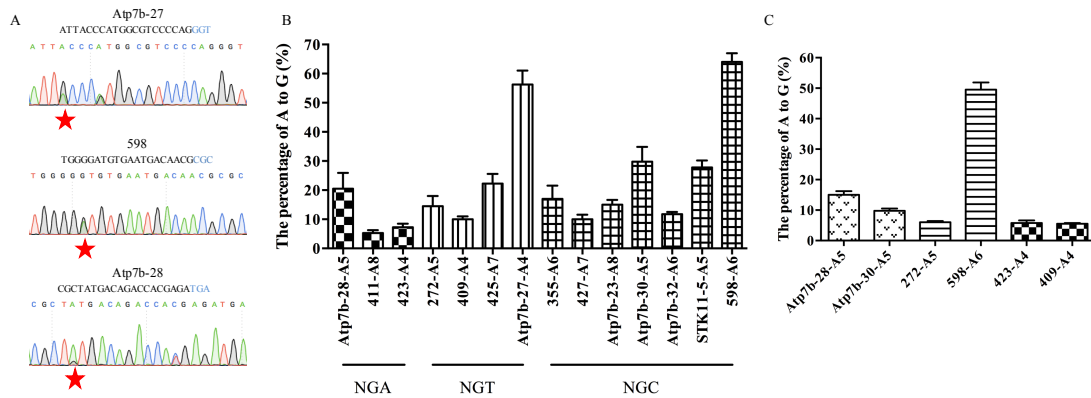

#### Supplementary figure 4. BPNLS-xABE can efficiently mimic pathogenic mutations in human cells.

- A. Sequence chromatogram of 3 representative pathogenic sites with NGA, NGT or NGC PAM were presented. The PAM sequences are highlighted in blue, red stars indicate the desired pathogenic mutations introduced by BPNLS-xABE.
- B. The histogram of editing efficiency of BPNLS-xABE on different pathogenic sites with NGH PAM. The editing frequencies were presented as the percentage of A-to-G conversion, all data were from at least three independent experiments, the target loci with same PAM were underlined and indicated. Data from three independent experiments are shown as means  $\pm$  s.e.m.
- C. The histogram of editing efficiency of BPNLS-xABE with two targeting loci simultaneously in human cells, the sgRNAs transfected simultaneously were filled in same pattern. Data from three independent

experiments are shown as means  $\pm$  s.e.m.

### Supplementary figure 5

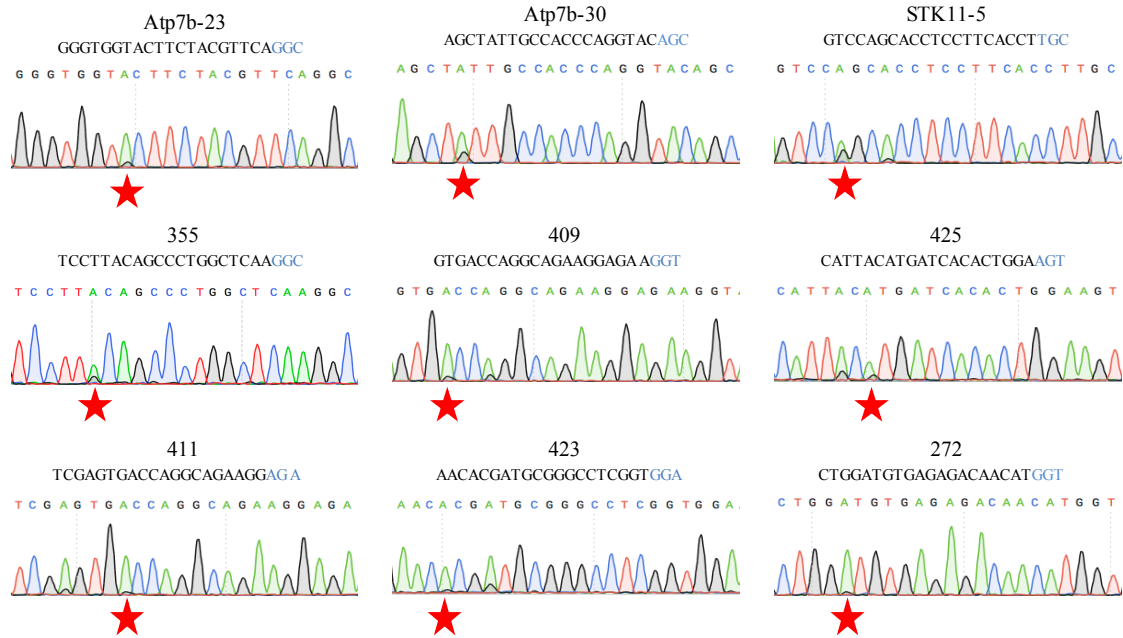

### Supplementary figure 5. Sequence chromatogram of pathogenic mutations

introduced by **BP-NLS-xABE** in human cells. Cells were transfected with BP-NLS-xABE and sgRNAs, genomic DNA was extracted and amplified for Sanger sequencing. The sequence chromatogram of representative sites with different PAM were presented, the PAM sequences are highlighted in blue. Red stars indicate the desired pathogenic mutation introduced by BP-NLS-xABE.

### Supplementary Table 1. sgRNAs from previous study used in this study

| sgRNA name | Spacer               | PAM |
|------------|----------------------|-----|
| xsite1     | GATGACAGGCAGGGGCACCG | CGG |
| xsite4     | GGCACTGCGGCTGGAGGTGG | GGG |
| xsite6     | GCGGTCTCAAGCACTACCTA | CGT |
| xsite7     | GAGCTGCACATACTAGCCCC | TGT |
| xsite8     | GCTTCTCCAGCCCTGGCCTG | GGT |
| xsite10    | GACAGGCAGGGGCACCGCGG | CGC |
| xsite12    | GCAGACGGCAGTCACTAGGG | GGC |
| xsite13    | GTCGCAGGACAGCTTTTCCT | AGA |

|         |                      |     |
|---------|----------------------|-----|
| xsite14 | GGGAAGCTGGGTGAATGGAG | CGA |
| xsite15 | GCGGAGACTCTGGTGCTGTG | TGA |
| xsite16 | GGTCAGAAATAGGGGGTCCA | GGA |
| xsite18 | GATCCAGGTGCTGCAGAAGG | GAT |
| xsite19 | GTCACTCCAGGATTCCAATA | GAT |

**Supplementary Table 2. Pathogenic sites used in this study**

| Pathogenic sites   | Sequence              | PAM |
|--------------------|-----------------------|-----|
| 337                | GGGCACGTTGTGGGTGACGC  | CGT |
| 345                | GCTGACCGGGACTGGTACTC  | AGA |
| 371                | GATGACGATCACTGTCGCTA  | TGA |
| 379                | CCTGCTCGAGACAGGAGCTA  | TGC |
| 383                | ACCGTACTCAGCACCTCAG   | TGT |
| 387                | TAGGTGCGCTCACCTTCAGT  | GGA |
| 393                | GGCGGCGTGGATAGCCAAAG  | GGA |
| 397                | CAGCACGAAGGAAATGGGGA  | TGA |
| 407                | ACTTGGCTTGTGTAAGTGAT  | GGT |
| Atp7b-2            | CGTGTGCAAGAATGTCACAG  | GGC |
| Atp7b-16           | GATCACGGGGGACAACCGGA  | AGA |
| STK11-2            | CAGGTGCGGAGATTTTGAGGG | TGC |
| 636                | ATACGCGTGCTGCTTGGTTC  | AGA |
| 640                | CAGGCACAGACAGCACACAT  | TGT |
| 272                | CTGGATGTGAGAGACAACAT  | GGT |
| 355                | TCCTTACAGCCCTGGCTCAA  | GGC |
| 409                | GTGACCAGGCAGAAGGAGAA  | GGT |
| 411                | TCGAGTGACCAGGCAGAAGG  | AGA |
| 423                | AACACGATGCGGGCCTCGGT  | GGA |
| 425                | CATTACATGATCACACTGGA  | AGT |
| 427                | ATGATCACACTGGAAGTCCC  | TGC |
| ATP7b-23           | GGGTGGTACTTCTACGTTCA  | GGC |
| ATP7b-27           | ATTACCCATGGCGTCCCAG   | GGT |
| ATP7b-28           | CGCTATGACAGACCACGAGA  | TGA |
| ATP7b-30           | AGCTATTGCCACCCAGGTAC  | AGC |
| ATP7b-32           | CATCCAGGGCTGCAGCACAA  | TGC |
| STK11-5            | GTCCAGCACCTCCTTCACCT  | TGC |
| 598                | TGGGGATGTGAATGACAACG  | CGC |
| A16-mut-Correction | GTCCCCATGATCAGAACCA   | CGT |
| A27-mut-Correction | ATGGGCAATGGTGCCAGTCT  | TGT |

**Supplementary Table 3. Primers used for PCR amplification of sgRNAs**

| Target sgRNAs | Forward              | Reverse              |
|---------------|----------------------|----------------------|
| xsite1        | GAACCCAGGTAGCCAGAGAC | TCCTTTCAACCCGAACGGAG |
| xsite4        | GAACCCAGGTAGCCAGAGAC | TCCTTTCAACCCGAACGGAG |



|                 |                       |                        |
|-----------------|-----------------------|------------------------|
| xsite6          | GGGGTCCCAGGTGCTGAC    | CATTGCAGAGAGGCGTATCA   |
| xsite7          | ATGTGGGCTGCCTAGAAAGG  | CCCAGCCAAACTTGTCAACC   |
| xsite8          | ATGTGGGCTGCCTAGAAAGG  | CCCAGCCAAACTTGTCAACC   |
| xsite10         | GAACCCAGGTAGCCAGAGAC  | TCCTTTCAACCCGAACGGAG   |
| xsite12         | GCCCATTCCCTCTTTAGCCA  | CTCAACCCACACGCACA      |
| xsite13         | ATGTGGGCTGCCTAGAAAGG  | CCCAGCCAAACTTGTCAACC   |
| xsite14         | GCCCATTCCCTCTTTAGCCA  | CTCAACCCACACGCACA      |
| xsite15         | GAACCCAGGTAGCCAGAGAC  | TCCTTTCAACCCGAACGGAG   |
| xsite16         | GTCAGAGGGACACACTGTGG  | AATGGGCTTTGGAAAGGGGG   |
| xsite18         | CATTGCAGAGAGGCGTATCA  | GGGGTCCCAGGTGCTGAC     |
| xsite19         | GAGGACGTGTGTGTCTGTGT  | ATATTGAAGGGGGCAGGGGA   |
| 337             | CGCACAGGCATCGTGCTG    | GAATGCCCGCCGACTCCA     |
| 345             | TTCTGGCTGCTCGGCTAC    | GTCAATGTCCCTGATGTTATGC |
| 371             | ACCTCATCCAAATGTCCC    | GAATGAAAACCAAAACAAGA   |
| 379             | TCCCATCTCCACTGTTCC    | CAGCTCCCATCATTCTTTT    |
| 383             | TCCCATCTCCACTGTTCC    | CAGCTCCCATCATTCTTTT    |
| 387             | TTTTATGCTGGGCTATGAC   | TCTGGAACATCTGGGTCA     |
| 393             | GGCACAGCTCCACCTAAT    | AAACAGCACAGCCAAGAC     |
| 397             | GCAGTCCCACTCCTACCCA   | GTCCGCACCTTTCCTAC      |
| 407             | CTTTCTTGCGTTTCTACTTCC | TGGTACACTGGCCCTGA      |
| Atp7b-2         | ATTCATAAACGCCCATCA    | ATGGAGGTTTCCTATTTT     |
| Atp7b-16        | ATGATCGCAATCGCAGAC    | CAGCAAGGGAGAAAGAGC     |
| STK11-2         | CCTGCTGGACCTAGCCTTTC  | ATCTCGGGCGGCTGGAAA     |
| 636             | TGAACTCCCTGAGTGGTA    | ACTGCAATTTGCCCTTAA     |
| 640             | CATCTGCCAGTTACAAGA    | AAAGCATTACTCACCTC      |
| 272             | AGGCTGGTCTCAAACCTCG   | GAAGGCTGGACTCTAAAA     |
| 355             | TTCTGGCTGCTCGGCTAC    | GTCAATGTCCCTGATGTTATGC |
| 409             | GACAGGTTGCAGGTGGATT   | TGGGACAGAGGTGGGTCT     |
| 411             | GACAGGTTGCAGGTGGATT   | TGGGACAGAGGTGGGTCT     |
| 423             | TTTTATGCTGGGCTATGAC   | TCTGGAACATCTGGGTCA     |
| 425             | TCCCATCTCCACTGTTCC    | CAGCTCCCATCATTCTTTT    |
| 427             | TCCCATCTCCACTGTTCC    | CAGCTCCCATCATTCTTTT    |
| ATP7b-23        | ATTCATAAACGCCCATCA    | ATGGAGGTTTCCTATTTT     |
| ATP7b-27        | GAACCCTGAGATTGAACGA   | CCTTTGTGATAACCTGGAAC   |
| ATP7b-28        | CAAGAGGTGCTTACAAGG    | GAGCCAGTGGAAGAATGAA    |
| ATP7b-30        | ATGATCGCAATCGCAGAC    | CAGCAAGGGAGAAAGAGC     |
| ATP7b-32        | TGTGAGTGCGAGTTCTTTCTT | CCTGCTCATGGTGCTGATA    |
| STK11-5         | TCGACTCCACCGAGGTCA    | CAAGAGCCCATGCAAACG     |
| 598             | CCTCAGCACCGCCTAACT    | CTGGGCAGAAGAGCCACA     |
| A16-mut-Correct | ATGATCGCAATCGCAGAC    | CAGCAAGGGAGAAAGAGC     |
| A27-mut-Correct | GAACCCTGAGATTGAACGA   | CCTTTGTGATAACCTGGAAC   |

**Supplementary Table 4. Primers used for on-target deep sequencing**

| On-targets | Forward                      | Reverse                       |
|------------|------------------------------|-------------------------------|
| xsite4     | TGACCAAGAACCCAGGTAGCCAGAGAC  | TGACCAATCCTTTCAACCCGAACGGAG   |
| xsite6     | AGTTCCGGGGTCCCAGGTGCTGAC     | AGTTCCCATTGCAGAGAGGGCGTATCA   |
| xsite7     | CCGTCCATGTGGGCTGCCTAGAAAGG   | CCGTCCCCCAGCCAAACTTGTCAACC    |
| xsite12    | GAGTGGAGCCCATTCCTCTTTAGCCA   | GAGTGGACTCAACCCACACGCACA      |
| xsite13    | GTGAAATGATGTGGGCTGCCTAGAAAGG | GTGAAATGCCAGCCAAACTTGTCAACC   |
| xsite14    | CACCGGTGGCCCATTCCTCTTTAGCCA  | CACCGGTGCTCAACCCACACGCACA     |
| xsite15    | CTTGTAGAACCCAGGTAGCCAGAGAC   | CTTGTATCCTTTCAACCCGAACGGAG    |
| xsite16    | TCCCGAGTCAGAGGGACACTGTGG     | TCCCGAAATGGGCTTTGGAAAGGGGG    |
| xsite18    | TCCCGATGGGGTCCCAGGTGCTGAC    | TCCCGATGCATTGCAGAGAGGGCGTATCA |
| xsite19    | TACAGCGAGGACGTGTGTGTCTGTGT   | TACAGCATATTGAAGGGGGCAGGGGA    |
| 383        | CACTGGAAGTCCCTGCTC           | CTCCCATCATTCTTTTCTACTC        |
| 387        | TTTTATGCTGGGCTATGA           | TGCCTGGCTCCTTCCTAC            |

**Supplementary Table 5. Primers used for off-target deep sequencing**

| Off-targets | Forward              | Reverse                |
|-------------|----------------------|------------------------|
| 387-OT1     | GAATAAAGGCAAGGCAAAC  | AATGAGAAAGGAGGAGGG     |
| 387-OT2     | TAACCTGCCCAAGTTTGC   | CCCTTCCCGACTTTCTTC     |
| 387-OT3     | TCAAGAAGATAAAGCGAAGA | TCACATTGATGAGGCAGT     |
| 387-OT4     | AGTGATCGGGCTAAGTCA   | TTCATCGGTGAAACTGG      |
| 387-OT5     | CCAGATTTTGTCCCACTC   | GAAATAAAGGCAAAGTTCTA   |
| 387-OT6     | ACCTGTCTGTCCCTTCCA   | AGGGTGCTTTGACCTTTT     |
| 387-OT7     | AGCCAGAAATACCAAATCC  | CTGCCATGAAGCACAGAG     |
| 387-OT8     | AGAATGGGATGAAATGGA   | AAGGATGGACTCTTGGGT     |
| 387-OT9     | GCCGTGTCCTGAATGGTG   | AAAGGCTGCTGGGTTTGG     |
| 387-OT10    | CTTTGCCATCGGTCTTTG   | GCTTAGCGACTACAGGGA     |
| 387-OT11    | TTTTCAGAGTGTTACCCAT  | CCAGCAACAACATTCTTACCT  |
| 387-OT12    | AGGCCCTCAGTAAGTTGG   | AGAGTGGCGATTTCTATC     |
| 387-OT13    | GAGACAAGCTGCTTCTG    | TTTTCTCCAAAGTACAAC     |
| 387-OT14    | GCTATACTGCCATCACTT   | GTAACATTCTGGGGTAA      |
| 387-OT15    | ACCTGCGTCCCTCCTACA   | CTCCGAAGCTCCAGTGCTAT   |
| 387-OT16    | GATGAAGCCACTGTTAGG   | AAGGCATGTGGTAAACTC     |
| 383-OT1     | CACCACGGGCACATAGAC   | GGGAAGGGTACTGGGTTC     |
| 383-OT2     | ACGCAGCCTTCATGTTAA   | ACACTGCTCCAGGGACAC     |
| 383-OT3     | TTCTACCTTGGTGCTAT    | GACTTCTGGGATGTCTGG     |
| 383-OT4     | GGCAGAATGGCTTTGTTT   | GCATCATTGCATTGGATA     |
| 383-OT5     | GCAGCCAAAGATGAAGAG   | ATGGGTGAAATTATGACTGAAC |
| 383-OT6     | TGTTCCCTTCCCTTTCTT   | AGAGCCACTGGACTTTGAG    |
| 383-OT7     | TGGCTGGAGCGAAATAAA   | CGTAGTGGGCACATCATAG    |
| 383-OT8     | GGGCATTGGCACCTGTCT   | ACCCGCTCACTGGATGGA     |
| 383-OT9     | AACAACCCTATCACCCT    | AACAACCCTATCACCCT      |
| 383-OT10    | TGAGGTAAACGGATGGTA   | ATCAATGGGAAGAGTGGG     |

|          |                      |                    |
|----------|----------------------|--------------------|
| 383-OT11 | ATGGCTGCAACAACCTTC   | ACCTATCTCCCTCCTCCC |
| 383-OT12 | GTGCGCTGCCGTAAATCT   | TTCCCCTGGTAAACATCC |
| 383-OT13 | TCACTATGTCATGGAAGAGC | AAGAAAAGGAAAGGGAGA |
| 383-OT14 | CTCACTTTGACAGGGCTTGG | GGCAGAACAGGGATTGGA |
| 383-OT15 | GCTGGGTGAATGAAAGAG   | GTGTTGCGGATAACCTTT |
| 383-OT16 | CTCCACGCCACCTAACA    | AGCCTGAATCCCACCTCC |
